# Supplementary material for: Anticancer Activity of Continentalic Acid in B-Cell Lymphoma
Source: MDPI journal article supplement (doi:10.3390/molecules26226845), 2021-11-12
Supplement: s1 [file s1]

## Supplementary Materials

### Anticancer Activity of Continentalic Acid in B-Cell Lymphoma

Byeol-Eun Jeon<sup>1</sup>, Chan-Seong Kwon<sup>1</sup>, Ji-Eun Lee<sup>1</sup>, Keumok Moon<sup>2</sup>, Jaeho Cha<sup>1,2</sup>, Inmyoung Park<sup>4</sup>, Sara Koh<sup>5</sup>, Myunghee Yoon<sup>6</sup>, Sang-Woo Kim<sup>1,3\*</sup> and Jeong Nam Kim<sup>1,2\*</sup>

<sup>1</sup> Department of Integrated Biological Science, Pusan National University, Busan 46241, Republic of Korea; starsilver20@naver.com (B.-E.J.); ckstjd5091@naver.com (C.-S.K.); dlwldms4535@naver.com (J.-E.L.); jhcha@pusan.ac.kr (J.C.)

<sup>2</sup> Microbiological Resource Research Institute, Pusan National University, Busan 46241, Republic of Korea; moonko81@nate.com (K.M.)

<sup>3</sup> Department of Biological Sciences, Pusan National University, Busan 46241, Republic of Korea

<sup>4</sup> Department of Asian Food and Culinary Arts, Youngsan University, Busan 48015, Republic of Korea; inmpark@gmail.com

<sup>5</sup> Department of Biological Sciences, Southern Methodist University, Dallas, TX 75206, the United States of America; kohs@mail.smu.edu

<sup>6</sup> Division of Hepatobiliary and Pancreas Surgery, Department of Surgery, Biomedical Research Institute, Pusan National University, Busan, 46241, Republic of Korea; ymh@pusan.ac.kr

\* Correspondence: kimjn@pusan.ac.kr (J.N.K.); Tel.: +82-51-510-2269, kimsw@pusan.ac.kr (S.-W.K.); Tel.: +82-51-510-2260

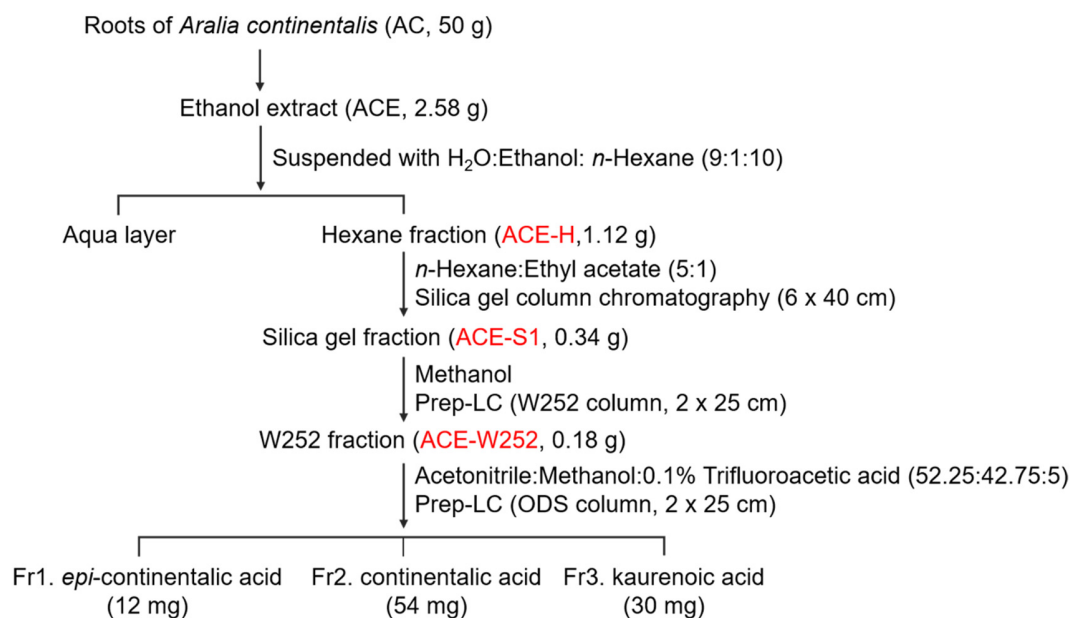

**Figure S1.** Extraction process of diterpenoids from the roots of *Aralia continentalis*.

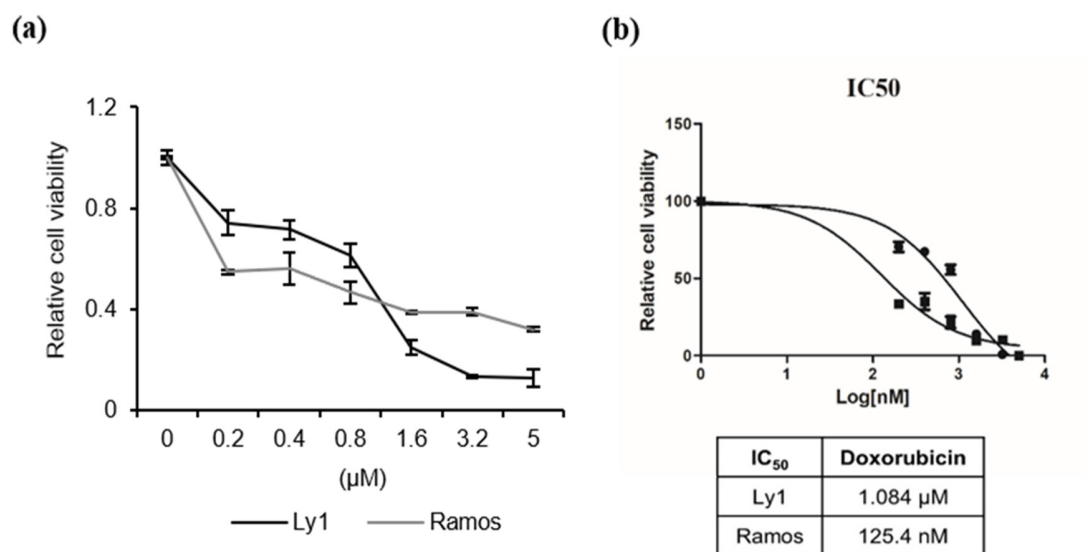

**Figure S2.** The anti-lymphoma effect of doxorubicin. **(a)** Ly1 and Ramos cells were treated with Doxorubicin (0, 0.2, 0.4, 0.8, 1.6, 3.2, 5  $\mu\text{M}$ ) for 24 h, and cell viability was measured using MTS assay. **(b)** The IC<sub>50</sub> values of Doxorubicin in Ly1 and Ramos cells were calculated using GraphPad Prism 5 software.
